# Supplementary material for: The Effect of Cadence on Shank Muscle Oxygen Consumption and Deoxygenation in Relation to Joint Specific Power and Cycling Kinematics
Source: PLOS journal article supplement (doi:10.1371/journal.pone.0169573), 2017-01-06
Supplement: S1 (10.1371/journal.pone.0169573.s001) [file journal.pone.0169573.s001]

# Oxygenation, local muscle oxygen consumption and joint specific power in cycling: the effect of cadence at a constant external work rate

Knut Skovereng<sup>1</sup> · Gertjan Ettema<sup>1</sup> · Mireille C. P. van Beekvelt<sup>1</sup>

Received: 12 October 2015 / Accepted: 11 April 2016  
© The Author(s) 2016. This article is published with open access at Springerlink.com

## Abstract

**Purpose** The present study investigates the effect of cadence on joint specific power and oxygenation and local muscle oxygen consumption in the vastus lateralis and vastus medialis in addition to the relationship between joint specific power and local muscle oxygen consumption ( $mVO_2$ ).

**Methods** Seventeen recreationally active cyclists performed 6 stages of constant load cycling using cadences of 60, 70, 80, 90, 100 and 110 rpm. Joint specific power was calculated using inverse dynamics and  $mVO_2$  and oxygenation were measured using near-infrared spectroscopy.

**Results** Increasing cadence led to increased knee joint power and decreased hip joint power while the ankle joint was unaffected. Increasing cadence also led to an increased deoxygenation in both the vastus lateralis and vastus medialis. Vastus lateralis  $mVO_2$  increased when cadence was increased. No effect of cadence was found for vastus medialis  $mVO_2$ .

**Conclusion** This study demonstrates a different effect of cadence on the  $mVO_2$  of the vastus lateralis and vastus medialis. The combined  $mVO_2$  of the vastus lateralis and medialis showed a linear increase with increasing knee joint specific power, demonstrating that the muscles combined related to power generated over the joint.

**Keywords** Near-infrared spectroscopy · Muscle  $VO_2$  · Joint specific power · Cycling · Cadence

## Abbreviations

|           |                                |
|-----------|--------------------------------|
| AO        | Arterial occlusion             |
| HHb       | Deoxyhaemoglobin               |
| MAP       | Maximal aerobic power          |
| $mVO_2$   | Muscle oxygen consumption      |
| NIRS      | Near-infrared spectroscopy     |
| $O_2Hb$   | Oxyhaemoglobin                 |
| $pVO_2$   | Whole body oxygen consumption  |
| $StO_2$   | Tissue saturation index        |
| tHb       | Total haemoglobin              |
| VL        | Vastus lateralis               |
| VM        | Vastus medialis                |
| $WR_{lt}$ | Work rate at lactate threshold |

## Introduction

Cycling research has focused much on the effect of cadence on cycling energetics (Ettema and Loras 2009). With the exception of low cadence (<60 rpm), there is a trend for the metabolic cost to increase with increasing cadence, and there seems to be an optimal cadence which increases with increasing work rate (Foss and Hallen 2004). Despite this, the most energetically efficient cadence at a specific external work rate has been shown to be lower than the self-chosen cadence by cyclists (Foss and Hallen 2004; Lucia et al. 2004). However, other factors than whole body metabolic cost plays a role in how we pedal.

Apart from a change in metabolic cost, changing cadence also leads to technical responses, such as alternations in muscle activation and force effectiveness, among others (Ansley and Cangle 2009; Ettema and Loras 2009;

Communicated by Carsten Lundby.

✉ Knut Skovereng  
knut.skovereng@ntnu.no

<sup>1</sup> Department of Neuroscience, Centre for Elite Sports Research, NTNU, Norwegian University of Science and Technology, Trondheim 7491, Norway

Hug and Dorel 2009; Leirdal and Ettema 2011). Whereas the large mono articular muscles working over the hip and knee joints are regarded as the main power producing muscles (i.e., the gluteus and the vasti), the role of the muscles working over the ankle joint is also to transfer this power to the crank (Zajac 2002). The effect of both cadence and work rate on the relative joint contribution to external power, from the hip, knee and ankle, has been studied as well (Bini et al. 2010a; Elmer et al. 2011; Ericson 1988; Mornieux et al. 2007). The previous investigations regarding the effect of cadence on the relative joint power contribution to external work are not all in agreement, with some studies reporting no effect of cadence (Bini et al. 2010a; Ericson 1988) and some studies reporting increasing knee joint and decreasing hip joint contribution with increasing cadence (Elmer et al. 2011; Mornieux et al. 2007). All studies do agree that relative ankle contribution to external power is largely unaffected across cadences (Bini et al. 2010a; Elmer et al. 2011; Ericson 1988; Mornieux et al. 2007) with the exception of one study reporting increased ankle contribution (Bini et al. 2010b).

Going one step further, the joint power is a result from the action of multiple muscles. Most research on the effect of cadence on individual muscles has been focusing on the electrical activity of the muscle, as measured by EMG. However, the effect of cadence on the EMG results are ambiguous. Muscle activation of the vastus lateralis (VL) has been shown to decrease with increasing cadence in elite level cyclists (Lucia et al. 2004), while it remained stable in recreational cyclist (Sarre et al. 2003). In contrast, Neptune et al. (1997) found increased muscle activation in the vastus medialis (VM) following increased cadence. While EMG can provide indirect information about the magnitude of muscle force, it does not distinguish between the various energy systems required to initiate muscle contraction and force production. Additionally, an increase in cadence also results in increased movement speed, thereby affecting muscle recruitment by an increased involvement of fast twitch fibres (Sargeant 2007). To obtain an indication of the aerobic energy consumption, near-infrared spectroscopy (NIRS) can be used.

Near-infrared spectroscopy (NIRS) is a non-invasive, continuous method that can be used to measure concentration changes in oxygenated and deoxygenated haemoglobin and myoglobin (similarities in absorption spectra result in an inability to differentiate between haemoglobin and myoglobin). This allows us to investigate the balance between  $O_2$  delivery and extraction at the muscle level (Boone et al. 2014; Murias et al. 2013) and changes in deoxyhaemoglobin (HHb) and tissue saturation index ( $StO_2$ ) are thought to represent changes in the oxygen extraction of the microvasculature (DeLorey et al. 2003). Total haemoglobin

(tHb) is calculated by summing HHb and oxyhaemoglobin ( $O_2Hb$ ) and is used to evaluate changes in blood volume within the active tissue. Additionally, by applying an arterial occlusion (AO), the rate of change in HHb allows us to calculate local muscle oxygen consumption ( $mVO_2$ ).

Few studies have investigated the effect of cadence on VL muscle oxygenation during incremental external work rates and no clear agreement has been found (Boone et al. 2014; Ferreira et al. 2006). Also, investigations on the effect of cadence on muscle oxygenation at a constant power output show no clear agreement, reporting both an effect and no effect of cadence (Takaishi et al. 2002; Zorgati et al. 2013). Additionally, Zorgati et al. (2013) reported only HHb, Takaishi et al. (2002) reported HHb and tHb, but none of these studies investigating oxygenation during constant load exercise reported  $StO_2$ . To the best of our knowledge, only one study has studied the effect of cadence on  $StO_2$  during constant load cycling exercise (Kounalakis and Geladas 2012) and reported no effect. However, the study by Kounalakis and Geladas (2012) only used two cadences and only focused on the VL.

Although there is no complete consensus with regard to muscles oxygenation and joint specific power, if we investigate the oxygenation and  $mVO_2$  response of a local muscle in relation to a joint specific measure of work rate, we would expect a linear relationship. Two issues are important when investigating this relationship. The  $mVO_2$  of bi-articular muscles would be hard to interpret because they work over two joints. Additionally, the outcome at the joint level is made up of multiple muscles. Therefore, measuring various mono-articular muscles working over the same joint would give a more accurate estimate of muscle energy consumption at one joint.

Examination of the joint specific power contribution and the corresponding metabolism in specific muscles coupled to each joint would help understand possible changes in the coordinative patterns and local muscle energetics in cycling at different cadences (Bini and Diefenthaler 2009; Ericson 1988). The purpose of the present study was therefore, to investigate the effect of cadence on the joint specific contribution to external power and the relationship between joint power and deoxygenation and  $mVO_2$  in the VL and VM during constant load cycling exercise.

## Methods

### Subject

Seventeen recreationally trained cyclists (mean  $\pm$  standard error: age  $40.6 \pm 1.4$  years; height  $181.4 \pm 1.2$  cm; body mass  $81.8 \pm 1.2$  kg;  $pVO_{2peak}$ ,  $55.1 \pm 1.2$  ml/kg/min;

maximum aerobic power,  $358.8 \pm 7.4$  W), thus categorized as level 3 cyclists (Ansley and Cangle 2009), participated in the study. We were given permission to conduct the study by the regional ethical committee and signed written informed consent was obtained from all participants prior to their participation in the study.

### Experimental protocol

The participants came to the laboratory on three separate days. On the first day an arterial occlusion test consisting of a 10-min arterial occlusion (AO) was performed. The AO was performed during rest in a semi-supine position with an inflatable cuff placed on the upper right thigh. The second day started with resting measurements of  $\dot{m}V\text{O}_2$ , blood lactate, heart rate and  $pV\text{O}_2$ . Resting measurements were followed by an incremental test, which started with 4 min of unloaded cycling followed by an incremental exercise protocol, starting at an external work rate 100 W, with 25 W increments every 4 min until the blood lactate level exceeded 4 mMol/l. Blood lactate was measured at the end of each work rate and a freely chosen cadence was used. The external work rate corresponding to 4 mMol/l was used as lactate threshold ( $WR_{lt}$ ). After a period of ~5 min using active recovery, a maximal aerobic power test (MAP-test) was conducted. The MAP-test consisted of an incremental test using 25 W/min increments in external work rate until voluntary exhaustion at a freely chosen cadence. The third day consisted of a controlled cadence test starting with a warm up period of cycling at 50 % of  $WR_{lt}$  at a freely chosen cadence followed by six 4-min stages at different cadences (i.e., 60, 70, 80, 90, 100 and 110 rpm) at a work rate corresponding to 75 % of  $WR_{lt}$ . The low external work rate was chosen in order to ensure predominantly aerobic metabolism. Muscle oxygenation, heart rate and  $pV\text{O}_2$  were measured continuously during all tests. Rating of perceived exertion and blood lactate were measured at the end of each stage of the controlled cadence test. Pedal force and kinematic variables were measured during 15-second periods, three times during each stage of the cadence controlled test. The subjects were not aware of the exact periods for pedal force and kinematic measurements. In order to measure muscle oxygen consumption, an AO was applied during the final 20 s of each stage of the cadence controlled test. The participants continued pedalling during the AO.

Skinfold thickness was measured at the first day of testing at the sites of the NIRS optodes. Body mass and height were measured on the first day of testing. The participants were instructed to cycle with a stable and constant trunk and hand position during all cycling tests in order to enable accurate calculation of changes in hip, knee and ankle angles.

### Measurements and equipment

All measurements were conducted in a laboratory with steady conditions (temperature ~22 °C and relative humidity ~45 %). All cycling tests were performed on a cycle ergometer with constant external work rate (Velotron, Racermate Inc., Washington, USA). Blood lactate was measured in 20 µl blood samples using the Biosen C-Line Sport lactate measurement system (EKF Industrial Electronics, Magdeburg, Germany). Heart rate was measured with a heart rate monitor (Polar RS800, Polar Electro OY, Kempele, Finland). Skinfold thickness was measured using a skinfold calliper (Holtain skinfold calliper, Holtain Ltd, Crymmych, Wales).

An open-circuit indirect calorimetry apparatus was used to measure  $pV\text{O}_2$  (Oxycon Pro, Jaeger GmbH, Hoechberg, Germany). The equipment was calibrated on each day of testing using a 3-liter syringe and a gas of known concentration (16.0 %  $\text{O}_2$  and 5.85 %  $\text{CO}_2$ , Riessner-Gase GmbH & Co, Lichtenfels, Germany).

Muscle oxygenation was assessed using two continuous wave near-infrared spectrophotometer systems (Oxymon MKIII and Portamon, Artinis Medical Systems, the Netherlands). The two systems were used simultaneously in order to measure two muscles in the right thigh [i.e., vastus lateralis (VL) and the vastus medialis (VM)]. Both systems had 3 transmitters and one receiver. For congruence in measurement depth, the inter-optode distance of 35 mm was used for further analysis of the concentration changes in oxy- and deoxyhaemoglobin/myoglobin. All transmitters emitted two wavelengths, which were 766 and 856 nm for the oxymon system and 762 and 841 nm for the portamon system. After the optode sites had been shaved, the optodes were placed on the muscle belly of the VL and VM muscles and secured with double-sided tape and elastic bandages. To ensure similar day-to-day optode placement, the sites of optode placement were marked on the first day of testing. An inflatable pneumatic cuff system (Hokanson E20 Rapid Cuff Inflator + Hokanson AG-101 Air Source, Marcom Medical ApS, Denmark) was used to apply the AOs. The cuff, placed on the top of the right thigh, was rapidly inflated (i.e. <0.5 s) to a pressure of 300 mmHg and rapidly deflated after 20 s of AO. An electrical signal corresponding to cuff inflation was used to synchronize the two NIRS systems.

Pedal forces were measured with pedals equipped with two force cells (Revere Model 9363, capacity 250 kg per cell, the Netherlands) capable of measuring vertical and horizontal forces with a sample rate of 500 Hz. The pedals were calibrated by applying shear and normal forces using weights of different magnitudes fastened on the pedals in directly vertical and horizontal directions. A detailed description of the force pedal system can be found in

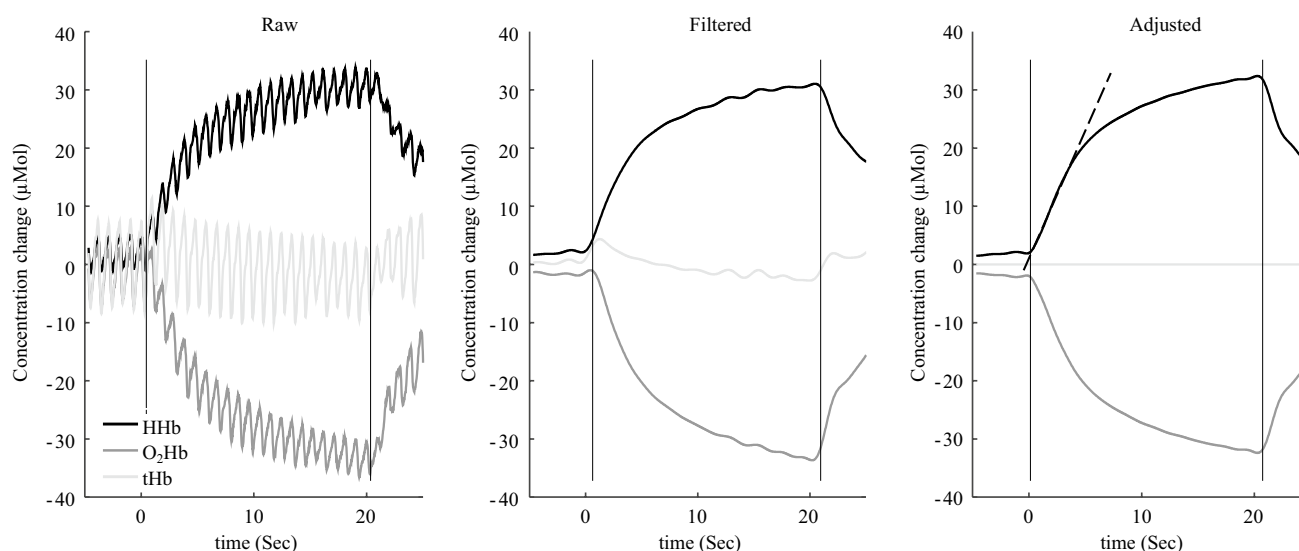

**Fig. 1** Examples of the raw, filtered and the corrected NIRS signal for oxyhaemoglobin (dark gray), deoxyhaemoglobin (black) and total haemoglobin (light gray) in the VL during one AO cycling at a

cadence of 60 rpm. Vertical lines indicate start and stop of the AOs and the dashed line show linear regression analysis used for calculation of  $mVO_2$  during the initial phase of occlusion

Ettema et al. (2009). Cycling kinematics were measured using a ProReflex 3D motion analysis system (Qualisys, Sweden) with eight cameras. Reflective markers were placed on the hip (greater trochanter), knee (lateral epicondyle) and ankle (lateral malleolus) joints and on custom made extensions placed symmetrically on the pedal axis.

### Data analysis

Heart rate for each work load was defined as the average of the last minute prior to the AOs.  $HR_{peak}$  was defined as the highest heart rate attained during the MAP-test.  $pVO_2$  was averaged over the last minute of each work load of the lactate threshold test and  $pVO_{2peak}$  was defined as the highest one-minute average attained during the MAP-test. Joint powers for the legs (i.e., hip, knee and ankle joints) were calculated using inverse dynamics for a linked system of rigid segments (Ettema et al. 2009; Hull and Jorge 1985; McGhie and Ettema 2011). Parameters for calculating masses and moments of inertia were taken from Van Soest et al. (1993). Joint powers were averaged over all complete crank cycles during each of the 15 s recordings of kinematic and kinetic measurements and are expressed as the absolute power for each joint. Additionally, knee joint power was calculated specifically for the flexion and extension phases of joint action (Martin and Brown 2009). Joint power results are presented for the right leg.

Tissue saturation ( $StO_2$ ), deoxyhaemoglobin (HHb), oxyhaemoglobin ( $O_2Hb$ ) and total haemoglobin (tHb) for each cadence were calculated as the average value during the final 30 s prior to each of the AOs. HHb,  $O_2Hb$  and tHb

are expressed as change from resting values in micromolar.  $StO_2$  is expressed in percentage of saturation.

Local muscle oxygen consumption ( $mVO_2$ ) was calculated as the slope of linear change in HHb during the AOs using simple linear regression. The calculation of  $mVO_2$  is based on the assumption that blood volume is constant during the AOs. Due to forceful contractions during cycling it is difficult to be certain that the assumption holds, thus, the NIRS signal was corrected for changes in blood volume according to Ryan et al. (2012) prior to  $mVO_2$  calculation. Example plots of raw, filtered and corrected NIRS signal is shown in Fig. 1. Since we were using two NIRS systems to measure  $mVO_2$  is expressed as rate of change relative to the physiological range from ischemic calibration (Ryan et al. 2012). We report absolute values of  $mVO_2$  in ml/100 g/min calculated according to van Beekvelt et al. (2001a) for comparison purposes. We cannot distinguish between aerobic and anaerobic metabolism contributions to joint specific power. Therefore, in order to minimize the anaerobic metabolism during the  $mVO_2$  calculations, only measurements with corresponding blood lactate  $<4.0$  mMol/l and RER values  $<1.0$  were included for  $mVO_2$  calculation. Additionally, all regression analyses were quality checked and because  $mVO_2$  is based on an assumption of linearity during calculation, only regressions with a  $R^2$  of 0.98 or better were included for further analysis.

### Statistical analysis

The descriptive data are presented as mean  $\pm$  standard error. The effect of cadence on absolute joint power,

**Table 1** Group mean and standard error for external work rate, Cadence,  $\text{pVO}_2$ , Heart rate, blood lactate and rating of perceived exertion (RPE)

| Target cadence (rpm)              | 60               | 70                     | 80                     | 90                     | 100                    | 110                     |
|-----------------------------------|------------------|------------------------|------------------------|------------------------|------------------------|-------------------------|
| External work rate ( $\text{W}$ ) | $154.1 \pm 4.67$ | $154.2 \pm 4.51$       | $155.6 \pm 4.74$       | $155.3 \pm 4.73$       | $157.2 \pm 4.48$       | $156.6 \pm 5.14$        |
| Cadence measured (rpm)            | $60.4 \pm 0.21$  | $70.1 \pm 0.28^{\#,*}$ | $80.0 \pm 0.15^{\#,*}$ | $89.6 \pm 0.25^{\#,*}$ | $98.7 \pm 0.39^{\#,*}$ | $109.4 \pm 0.13^{\#,*}$ |
| $\text{pVO}_2$ ( $\text{l/min}$ ) | $2.31 \pm 0.07$  | $2.37 \pm 0.06$        | $2.49 \pm 0.06^{\#,*}$ | $2.60 \pm 0.06^{\#,*}$ | $2.74 \pm 0.06^{\#,*}$ | $2.95 \pm 0.07^{\#,*}$  |
| Heart rate (% of peak)            | $64.6 \pm 0.85$  | $66.6 \pm 0.80^{\#,*}$ | $68.7 \pm 0.88^{\#,*}$ | $71.4 \pm 0.97^{\#,*}$ | $74.7 \pm 1.09^{\#,*}$ | $78.2 \pm 1.04^{\#,*}$  |
| Blood lactate ( $\text{mMol/l}$ ) | $1.06 \pm 0.06$  | $1.14 \pm 0.08$        | $1.29 \pm 0.08^*$      | $1.54 \pm 0.11^{\#,*}$ | $1.99 \pm 0.15^{\#,*}$ | $2.88 \pm 0.24^{\#,*}$  |
| RPE                               | $11.3 \pm 0.30$  | $12.0 \pm 0.24$        | $12.2 \pm 0.24$        | $12.5 \pm 0.26^{\#}$   | $13.1 \pm 0.32^{\#}$   | $13.5 \pm 0.43^{\#}$    |

$\#$  Indicates a significant change from a cadence of 60 rpm ( $p < 0.05$ )

$*$  Indicates a significant change from previous cadence ( $p < 0.05$ )

relative joint power contribution and  $\text{pVO}_2$  were evaluated using repeated measures ANOVA. If the assumption of sphericity was violated, results were adjusted according to the Greenhouse-Geisser correction. When significant main effects of work rate were found, post hoc analysis was performed using Bonferroni corrections to evaluate differences between cadences. Difference between resting condition and/or post warm up for HHb, StO<sub>2</sub>, O<sub>2</sub>Hb, tHb and  $\text{mVO}_2$  was evaluated using pair-samples  $t$  test.

We evaluated differences in the effect of cadence on HHb, O<sub>2</sub>Hb, StO<sub>2</sub> and  $\text{mVO}_2$  between the VL and VM with two-way repeated measures ANOVA. The  $-2$  Log likelihood ratio test was used to evaluate if the relationship between  $\text{mVO}_2$  and joint specific power was best described by a linear or quadratic model. Statistical significance was accepted at  $p < 0.05$  and all statistical analyses were performed using SPSS 22.0 (SPSS, Chicago, USA) for windows and Matlab R2013a (MathWorks inc. Natic, USA).

## Results

The freely chosen cadence during warm-up was  $88.6 \pm 2.3$  rpm. The external work rate calculated from pedal forces did not differ from the target work rate (i.e., 75 % of  $\text{WR}_{\text{lt}}$ ) set on the ergometer ( $168.2 \pm 4.7$  W). The external work rate used during the cadence test corresponded to  $47.0 \pm 0.9$  % of MAP and led to a  $\text{pVO}_2$  ranging from  $51.7 \pm 1.2$  to  $66.2 \pm 1.2$  % of  $\text{VO}_{2\text{peak}}$  at 60 and 110 rpm, respectively. The actual cadence was not significantly different from the target cadence during any of the conditions (Table 1). The effect of cadence on  $\text{pVO}_2$ , blood lactate, heart rate and rating of perceived exertion, in addition to the actual cadence and external work rate calculated from pedal forces is presented in Table 1. For both  $\text{pVO}_2$  and blood lactate, there was no change following the first cadence increase, but subsequent increases from 70 to 110 rpm led to a significant increase in  $\text{pVO}_2$  (all  $p > 0.05$ ). The rating of perceived exertion (RPE) was significantly increased at 90, 100 and 110 rpm compared to 60 rpm

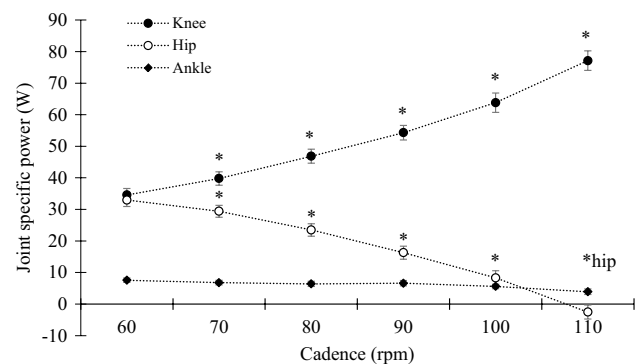

**Fig. 2** Group mean and standard error for hip (filled circles), knee (open circles) and ankle joint (filled diamonds) presented as absolute joint specific power. Asterisk indicate a significant change in hip and knee joint specific power from previous cadence ( $p < 0.05$ ). No change was found in ankle joint specific power

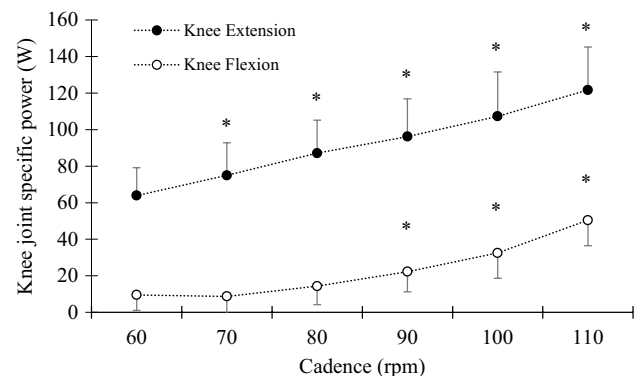

**Fig. 3** Group mean and standard error for knee extension (filled circles) and knee flexion (open circles) presented as absolute joint specific power. Asterisk indicates a significant change in joint power from previous cadence ( $p < 0.05$ )

( $p > 0.05$ ). Heart rate increased following all increases in cadence (all  $p > 0.05$ ). There was no difference between VL and VM skinfold thickness ( $10.2 \pm 1.0$  and  $11.3 \pm 0.9$  mm respectively,  $p = 0.19$ ).



When calculating joint specific power, the knee joint was found to be the main contributor to external work rate at all cadences with a joint specific power ranging from 34.6 to 77.1 W (corresponding to a relative contribution of 47 to 72 %) for 60 to 110 rpm, respectively (Fig. 2). Changing cadence had a significant effect on joint specific power (Fig. 2) with an increase in cadence leading to an increase in relative knee joint contribution [ $p < 0.05$ ,  $F(2,30) = 126.82$ ] and a decrease in relative hip joint contribution [ $p < 0.05$ ,  $F(3,36) = 174.06$ ]. When analysing knee flexion and extension phases of pedalling, the main contributor to external work rate was knee extension for all cadences (Fig. 3). We found a significant increase for knee joint contribution in both the flexion and extension phases [ $p < 0.05$ ,  $F(2,29) = 99.81$  and  $F(2,24) = 77.36$ , respectively]. Post-hoc analysis showed a continuous increase in knee joint extension from low to high cadences, while knee joint flexion showed a delayed increase (80–110 rpm) (Fig. 3).

Muscle oxygenation results are summarized in Table 2. There was no main effect of muscle on HHb, indicating that the changes in HHb during exercise were similar for VL and VM [ $p = 0.95$ ,  $F(1,16) = 2.01$ ]. There was a main effect of cadence on HHb [ $p < 0.05$ ,  $F(1,23) = 28.71$ ] showing that an increase in cadence led to increased HHb. Since no interaction effect was found [ $p = 0.19$ ,  $F(2,31) = 1.74$ ], the effect of cadence on HHb was similar for both muscles. Post-hoc analysis showed a continuous increase in HHb from low to high cadences in both muscles (Table 2).

For StO<sub>2</sub> during exercise however, there was a main effect of muscle with a more pronounced desaturation in

the VL as compared the VM ( $p < 0.05$ ,  $F(1,13) = 6.66$ ). On average StO<sub>2</sub> values for VL were  $5.85 \pm 2.3$  % lower than those for VM. There was a main effect of cadence on StO<sub>2</sub> as well, leading to a more pronounced desaturation with increasing cadence [ $p < 0.05$ ,  $F(2,28) = 24.96$ ]. No interaction effect was found [ $p = 0.42$ ,  $F(2,30) = 0.94$ ], indicating that the effect of cadence on desaturation was similar for both the VL and the VM muscles. Post-hoc analysis showed a continuous decrease in StO<sub>2</sub> from an increase in cadence from 70 rpm and above in both muscles (Table 2).

A main effect of muscle was found for changes in tHb during exercise, with on average, tHb values in the VL that were  $7.38 \pm 1.7$   $\mu\text{Mol}$  higher than those in the VM [ $p < 0.05$ ,  $F(1,16) = 6.76$ ]. However, there was no main effect of cadence [ $p = 0.24$ ,  $F(1,21) = 1.52$ ] and no interaction effect [ $p = 0.17$ ,  $F(2,24) = 1.94$ ], indicating that the change in cadence did not affect blood volume changes in either of the muscles.

A main effect of muscle was found for changes in O<sub>2</sub>Hb during exercise, with on average, O<sub>2</sub>Hb values in the VL that were  $7.50 \pm 1.9$   $\mu\text{Mol}$  higher than those in the VM [ $p < 0.05$ ,  $F(1,16) = 14.61$ ]. There was a main effect of cadence leading to a decrease in O<sub>2</sub>Hb with increasing cadence [ $p < 0.05$ ,  $F(1,23) = 17.77$ ]. There was no interaction effect [ $p = 0.17$ ,  $F(2,29) = 1.92$ ], thus the effect of cadence on O<sub>2</sub>Hb during exercise was similar for both muscles.

With regard to mVO<sub>2</sub> (in % ischemic calibration/second) during exercise there was a main effect of muscle with the VL showing a higher mVO<sub>2</sub> compared to the VM [ $p < 0.05$ ,  $F(1,8) = 37.73$ ]. On average, mVO<sub>2</sub> in the VL

**Table 2** Group mean and standard error for muscle oxygen consumption (mVO<sub>2</sub>), tissue saturation index (StO<sub>2</sub>), deoxyhaemoglobin (HHb), total haemoglobin (tHb) and oxyhaemoglobin (O<sub>2</sub>Hb)

|                                                | Rest            | 60 rpm                        | 70 rpm           | 80 rpm            | 90 rpm            | 100 rpm           | 110 rpm                          |
|------------------------------------------------|-----------------|-------------------------------|------------------|-------------------|-------------------|-------------------|----------------------------------|
| mVO <sub>2</sub> <sup>1</sup> VL(ml/100 g/min) | 0.13 $\pm$ 0.01 | 3.77 $\pm$ 0.51 <sup>a</sup>  | 4.00 $\pm$ 0.50  | 3.93 $\pm$ 0.52   | 4.05 $\pm$ 0.55   | 4.11 $\pm$ 0.51   | 4.73 $\pm$ 0.53                  |
| mVO <sub>2</sub> VM(ml/100 g/min)              | 0.12 $\pm$ 0.01 | 2.04 $\pm$ 0.24 <sup>a</sup>  | 2.11 $\pm$ 0.25  | 2.10 $\pm$ 0.23   | 2.10 $\pm$ 0.24   | 2.12 $\pm$ 0.25   | 2.28 $\pm$ 0.25                  |
| StO <sub>2</sub> <sup>2</sup> VL(%)            | 61.3 $\pm$ 3.9  | 55.18 $\pm$ 2.01 <sup>a</sup> | 54.12 $\pm$ 2.22 | 52.70 $\pm$ 2.21* | 51.27 $\pm$ 2.53* | 50.11 $\pm$ 2.48* | 47.96 $\pm$ 2.80* <sup>b,c</sup> |
| StO <sub>2</sub> VM(%)                         | 66.4 $\pm$ 0.6  | 60.80 $\pm$ 1.19 <sup>a</sup> | 59.50 $\pm$ 1.31 | 58.04 $\pm$ 1.46* | 56.94 $\pm$ 1.55* | 55.72 $\pm$ 1.63* | 54.75 $\pm$ 1.65* <sup>b,c</sup> |
| HHb VL( $\Delta\mu\text{Mol}$ )                | n/a             | 5.80 $\pm$ 1.42 <sup>a</sup>  | 6.91 $\pm$ 1.42* | 7.97 $\pm$ 1.50*  | 8.97 $\pm$ 1.67*  | 9.74 $\pm$ 1.75*  | 10.31 $\pm$ 1.81 <sup>b</sup>    |
| HHb VM( $\Delta\mu\text{Mol}$ )                | n/a             | 5.38 $\pm$ 1.65 <sup>a</sup>  | 6.75 $\pm$ 1.96* | 8.14 $\pm$ 2.18*  | 9.04 $\pm$ 2.25*  | 10.12 $\pm$ 2.32* | 10.93 $\pm$ 2.38 <sup>b</sup>    |
| tHb VL( $\Delta\mu\text{Mol}$ )                | n/a             | 15.05 $\pm$ 1.48 <sup>a</sup> | 16.13 $\pm$ 1.55 | 16.33 $\pm$ 1.56  | 16.26 $\pm$ 1.61  | 16.21 $\pm$ 1.63  | 15.58 $\pm$ 1.77                 |
| tHb VM( $\Delta\mu\text{Mol}$ )                | n/a             | 8.40 $\pm$ 1.71 <sup>a</sup>  | 8.85 $\pm$ 1.67  | 8.95 $\pm$ 1.69   | 8.65 $\pm$ 1.84   | 8.41 $\pm$ 1.92   | 7.99 $\pm$ 1.94                  |
| O <sub>2</sub> Hb VL( $\Delta\mu\text{Mol}$ )  | n/a             | 9.25 $\pm$ 1.36 <sup>a</sup>  | 9.23 $\pm$ 1.48  | 8.36 $\pm$ 1.53   | 7.30 $\pm$ 1.72*  | 6.47 $\pm$ 1.81*  | 5.27 $\pm$ 2.01 <sup>b,c</sup>   |
| O <sub>2</sub> Hb VM( $\Delta\mu\text{Mol}$ )  | n/a             | 3.02 $\pm$ 1.75               | 2.11 $\pm$ 2.07  | 0.81 $\pm$ 2.27   | −0.39 $\pm$ 2.39* | −1.71 $\pm$ 2.46* | −2.94 $\pm$ 2.45 <sup>b,c</sup>  |

\* Indicates a significant change from previous cadence ( $p < 0.05$ )

<sup>a</sup> Cadence controlled test is different from rest ( $p < 0.05$ )

<sup>b</sup> Main effect of cadence ( $p < 0.05$ )

<sup>c</sup> Difference between muscles ( $p < 0.05$ )

<sup>1</sup> Due to the strict quality criteria for mVO<sub>2</sub> calculations a total of nine complete datasets were included in the two-way ANOVA for mVO<sub>2</sub>

<sup>2</sup> Due to a malfunction with the NIRS equipment, only 14 participants were included for calculation of StO<sub>2</sub> for the VL

was  $5.3 \pm 0.9$  % ischemic calibration/second for the VL and VM respectively. There was a main effect of cadence [ $p < 0.05$ ,  $F(5,40) = 2.72$ ], leading to increased  $mVO_2$  with increased cadence. There was also an interaction effect [ $p < 0.05$ ,  $F(5,40) = 5.51$ ], thus the effect of cadence was different for the two muscles. As can be seen in Fig. 4, post hoc analysis showed that the VL  $mVO_2$  increased significantly at 110 compared to 60 rpm [ $p < 0.05$ ,  $F(1,9) = 7.87$ ], whereas no change in  $mVO_2$  was found for VM [ $p = 0.28$ ,  $F(2,18) = 1.38$ ].

When the effect of cadence on VL  $mVO_2$  as a function of knee joint specific power was investigated, a quadratic model was superior to a linear model, thus indicating a non-linear relationship (LogLikelihood ratio = 11.7;  $p < 0.05$ ) (Fig. 5a). When we combined  $mVO_2$  of the VL and VM, we found only a tendency for a main effect of cadence [ $p = 0.07$ ,  $F(3,20) = 2.73$ ]. When the combined  $mVO_2$  of the VL and VM, was expressed as a function of knee joint power, there was no difference between the linear and quadratic models, thus indicating a linear relationship (LogLikelihood ratio = 1.44;  $p = 0.23$ ) (Fig. 5b).

## Discussion

The purpose of this study was to investigate the effect of cadence on joint specific power contribution and local muscle deoxygenation and  $mVO_2$  in the VL and VM during constant load cycling exercise. The main finding was that increased cadence led to an increase in  $mVO_2$  the VL but not the VM. However, when combined, the VL and VM  $mVO_2$  showed a linear relationship with knee joint specific power. Additionally, we found a significant effect of increasing cadence, leading to increased knee joint specific power and deoxygenation and a decreased  $StO_2$  and  $O_2Hb$  in the VL and VM. This is the first study to report the effect of cadence on  $StO_2$  in more than one muscle during constant load cycling exercise.

As expected there was an effect of increasing cadence on  $pVO_2$  which was increased at 80 rpm compared to 60 rpm. Also further increases in cadence above 80 rpm led to an increase in  $pVO_2$ . Blood lactate and heart rate was also increased with increasing cadence. All of which are in accordance with previous reports (Foss and Hallen 2004).

We found knee extension was the main power producing joint action and we found an increasing knee joint and decreasing hip joint contribution with increasing cadence. As expected, we found that the ankle contribution to external power was not affected by cadence (Bini et al. 2010a; Elmer et al. 2011; Ericson 1988; Mornieux et al. 2007).

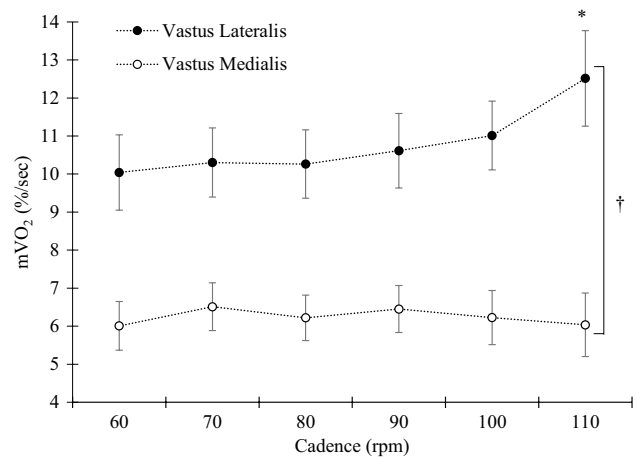

**Fig. 4** Group mean and standard error for muscle  $VO_2$  for the VL (filled circles) and VM (open circles) presented as change in percent of ischemic calibration per second. Asterisk indicate a significant increase in  $mVO_2$  when compared to the 60 rpm condition. Dagger indicate a significant difference in the effect of cadence between the VL and VM muscles

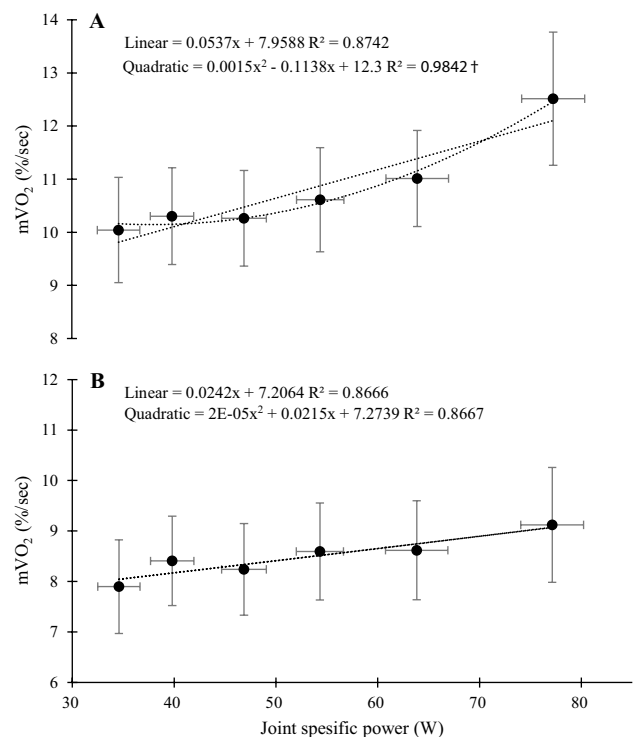

**Fig. 5 a** Mean and standard error for  $mVO_2$  of the VL presented as a function of knee joint specific power (W). Linear and quadratic models are fitted to the data. Dagger indicate a significant better fit of the quadratic equation. **b** Mean and standard error for  $mVO_2$  of the VL and VM combined presented as a function of knee joint specific power (W). Linear and quadratic models are fitted to the data

The effect of cadence was in accordance with our hypothesis and reports by Elmer et al. (2011) and Mornieux et al. (2007). Ericson (1988) reported no effect of cadence, but this might be due to the use of both increasing work rate and cadence as increase in work rate has been shown to increase relative hip contribution at low to moderate work rates (Skovereng et al. 2015). Elmer et al. (2011) reported hip extension to be the main contributor to external power production, but this may be due to a much larger work rate used. Additionally, knee extension has been reported to be the main contributor at low to moderate work rates comparable to the ones used in the present study (Skovereng et al. 2015). We found that increasing cadence from 60 to 110 rpm led to a shift in joint specific power with a total increase in knee joint power of ~43 W (i.e. ~25 % of external load) and a corresponding decrease in hip joint power. When calculating joint power from inverse dynamics, it is not possible to quantify the amount of power transfer from bi-articular muscles. Additionally, the power transfer to the hip from the upper body has been estimated to ~6 % (Brooker and Gregor 1994) and a change in hip transfer power may account for part of the shift in joint specific power from the hip to the knee as it was not quantified in the present study.

HHb increased in both the VL and VM muscles for all cadences increases except from 100 to 110 rpm. This is consistent with the findings of Boone et al. (2014) who reported increased HHb at 100 rpm compared to 50 rpm during an incremental protocol. Takaishi et al. (2002) reported increased bottom peak HHb during the pedal stroke at 85 rpm compared to 50 rpm. However, Zorgati et al. (2013) and Kounalakis and Geladas (2012) reported no difference in deoxygenation between 40–100 and 40–80 rpm, respectively. However, 40 rpm is substantially lower than the 60 rpm that was used in the present study and also lower than the 50 rpm that was used by Takaishi et al. (2002) and it is possible that deoxygenation is higher at very low cadences. Also, work rate at baseline reported by Boone et al. (2014) is very low so it is difficult to compare with the results of the present study.

Total haemoglobin was increased at 60 rpm compared to rest, but there was no effect of cadence for the VL or the VM. This is coherent with the findings of Takaishi et al. (2002) who reported no effect of cadence on blood volume. Contrary, Kounalakis and Geladas (2012) found decreased tHb at 80 compared to 40 rpm, but this was during a much longer duration than in the present study.

StO<sub>2</sub> decreased following increased cadence for both the VL and VM (Table 2). To the best of our knowledge, only one study has reported the effect of cadence on StO<sub>2</sub> during constant external work rate cycling exercise. Kounalakis and Geladas (2012) reported no difference in StO<sub>2</sub> at

40 and 80 rpm. Kounalakis et al. (2008) showed increased StO<sub>2</sub> at 80 compared to 40 rpm, but used different external work rates to yield a similar pVO<sub>2</sub>. We found decreased O<sub>2</sub>Hb following increased cadence, which is in accordance with previous reports (Kounalakis and Geladas 2012).

Since increasing cadence at a constant external work rate increases pVO<sub>2</sub>, our findings of increased HHb and decreased O<sub>2</sub>Hb and StO<sub>2</sub> is to be expected considering previous reports on increasing external work rate (Peltonen et al. 2013). There is a lack of studies investigating the effect of cadence on StO<sub>2</sub>, HHb, O<sub>2</sub>Hb and tHb during constant external work rate cycling exercise and this is to the best of our knowledge the first study to report StO<sub>2</sub> and O<sub>2</sub>Hb in multiple muscles during constant load exercise.

Considering mVO<sub>2</sub>, there is a difference in the effect of cadence in the mVO<sub>2</sub> of the VL and VM at a cadence of 110 rpm compared to 60 rpm and no main effect of cadence, a finding that was unexpected. Given the increase in knee extension power there should also be an increase in mVO<sub>2</sub> of the vasti. The absolute resting mVO<sub>2</sub> was ~0.13 and ~0.12 ml/100 g/min for the VL and VM respectively in the present study (Table 2) which is comparable to previous reports using NIRS derived mVO<sub>2</sub> in the forearm (Van Beekvelt et al. 2001b). Peak absolute mVO<sub>2</sub> was ~4.2 and ~2.3 ml/100 g/min for the VL and VM respectively in the present study (Table 2). This is comparable to that measured in the forearm (Van Beekvelt et al. 2001b).

The finding that increasing cadence did not affect VM mVO<sub>2</sub> can be due to changes resulting from muscle heterogeneity (Zorgati et al. 2013). Heterogeneity within muscles has been shown for mVO<sub>2</sub> following increasing work rate (Vogiatzis et al. 2015) and also larger heterogeneity for deoxygenation at higher cadences (Zorgati et al. 2013). Since we only used one optode on the VL and VM respectively in the present study, there is a possibility that such heterogeneity has influenced our results. To the best of our knowledge, there have been no reports on the effect of cadence on intra or inter-muscular heterogeneity of mVO<sub>2</sub>, but based on the reports on deoxygenation it may exist and this should be a focus for future studies.

A previously reported difference between the VL and VM is a larger proportion of fast twitch fibres in the VL compared to the VM (Johnson et al. 1973). With the increase in pedal rate, the muscle contraction velocity must increase and a muscle with a larger proportion of fast twitch fibres would have a greater potential for force generation at high contraction speeds. The larger proportion of fast-twitch fibres reported for the VL can contribute to the finding of increasing mVO<sub>2</sub> in the VL and not the VM at a high cadence.

From 60 to 100 rpm there seem to be no increase in the mVO<sub>2</sub> of the leg muscles but we still see an increase



in  $pVO_2$ . Part of the increase in  $pVO_2$  has been reported to originate in areas other than the legs (e.g., stabilization of the upper body). Umberger et al. (2006) showed increased  $pVO_2$  as cadence increased, but the energy expenditure of the leg muscles did not increase until cadence exceeded 100 rpm. This is in accordance with the results of the present study.

The response of HHb,  $O_2Hb$  and  $StO_2$  are to be expected when considering joint specific power. The increase in knee extension power indicates that the VL and VM will likely work harder. Correspondingly, the increased HHb and decreased  $O_2Hb$  and  $StO_2$  have previously been shown following increasing work rate (Boone et al. 2014), which has also been shown to increase knee extension power and VL  $mVO_2$  (Skovereng et al. 2015). The findings by Kounalakis and Geladas (2012), who reported no difference in  $StO_2$  at 40 and 80 rpm, contrast what you would expect from the results on knee joint power. However, Kounalakis and Geladas (2012) used a long duration protocol and the participants were not cyclists. Since fitness status has been shown to influence the effect of cadence on EMG, it can also be an influencing factor for oxygenation and due to the scarce amount of literature, should be investigated in future studies.

There is an increase in both joint specific power and  $mVO_2$  following and increase in cadence. An increase in increase in knee extension power would therefore to expected seeing as the VL are work harder, and therefore have a higher  $mVO_2$ . However, whereas knee joint power increased with most cadence increases, the increase in  $mVO_2$  was only significant at 110 rpm compared to 60 rpm. Based on in vitro studies, a linear relationship between work rate and oxygen consumption can be expected (Fenn 1924). However, it is very difficult to measure the work rate of individual muscles in vivo. Joint specific power does not reflect the work rate of individual muscles, but of muscle groups and this leaves potential for differences between muscles that work on the same joint. Differences between muscles are evident from the different effect of cadence on VL and VM  $mVO_2$ . Even though the VL and VM are affected differently by cadence, the combined  $mVO_2$  of the VL and VM displays a linear relationship with knee joint specific power. Although we cannot conclude that the slope of the combined VL and VM  $mVO_2$  to knee joint work rate relationship in the present study is representative for the actual muscle power- $VO_2$  relationship, it still indicates that the two individual muscles together generate the response seen at the joint.

The AO method was used to calculate  $mVO_2$  in the present study and this method relies on a constant blood volume within the measured tissue during the periods used for

$mVO_2$  calculation. This prerequisite is not always met and therefore a procedure for correction has been developed (Ryan et al. 2012). After manually checking the NIRS signal from the AOs, blood volume was not always constant and thus the NIRS signal was corrected for changes in blood volume prior to  $mVO_2$  calculation (Ryan et al. 2012).

Since we were interested in  $mVO_2$ , we tried to minimize the anaerobic part of the metabolism. We used a low to moderate intensity in the present study, and additionally, measurements with corresponding blood lactate above 4 mMol/l and RER values above one were excluded. Blood lactate does have a lag time before it is detectable in the blood of the fingertip, so local anaerobic processes could have occurred. It is possible that there are differences in the anaerobic metabolism in the VL and VM, despite our attempts at minimizing the anaerobic contribution. This could be one reason that we see differences in  $mVO_2$  of the VL and VM.

Taken together, we have taken precautions in order to obtain the reliable  $mVO_2$  values from NIRS and the AO method. However, the finding of a relatively large difference in VL and VM  $mVO_2$  was unexpected. This was also the case with the discrepancy between HHb and  $mVO_2$ . Given the large increase in knee extension power, a bigger increase in vasti  $mVO_2$  would be expected. We achieved quite good signal quality (Fig. 1) on most measurements. However, due to our criteria of a minimum  $R^2$  of 0.98, we had to exclude some of the participants during the analysis of the  $mVO_2$  data because of data quality for the 110 rpm condition. We still had sufficient participants (10 and 11 for the VL and VM respectively and 9 with a complete data set for both muscles) and additional analysis (unreported) excluding the 110 rpm condition showed findings coherent with those reported in this paper. However, due to the minimal literature using the method on the lower limbs, we recommend future investigators try to recreate our study in order to verify our findings on  $mVO_2$ .

We found no differences in skinfold thickness between VL and VM and, due to the different NIRS systems,  $mVO_2$  was expressed as change in percent of physiological range obtained from individual ischemic calibration (Brizendine et al. 2013), so any confounding of NIRS measurements, and thus  $mVO_2$  (van Beekvelt et al. 2001a), should be minimized.

In conclusion the present study demonstrates a significant effect of increasing cadence leading to increased knee joint specific power and a corresponding increases in HHb and decrease in  $StO_2$  and  $O_2Hb$ . Increasing cadence also lead to increased VL  $mVO_2$  but no effect of cadence was seen for the VM. The differences in the effect of cadence on  $mVO_2$  in the VL and VM shows that

differences between two mono-articular knee extensors occur when cyclists change cadence at a constant external work rate in cycling.

**Open Access** This article is distributed under the terms of the Creative Commons Attribution 4.0 International License (<http://creativecommons.org/licenses/by/4.0/>), which permits unrestricted use, distribution, and reproduction in any medium, provided you give appropriate credit to the original author(s) and the source, provide a link to the Creative Commons license, and indicate if changes were made.

## References

- Ansley L, Cangley P (2009) Determinants of optimal cadence during cycling. *Eur J Sport Sci* 9:61–85. doi:[10.1080/17461390802684325](https://doi.org/10.1080/17461390802684325)
- Bini RR, Diefenthaler F (2009) Mechanical work and coordinative pattern of cycling: a literature review. *Kinesiology* 41:25–39
- Bini RR, Rossato M, Diefenthaler F, Carpes FP, dos Reis DC, Moro ARP (2010a) Pedaling cadence effects on joint mechanical work during cycling. *Isokinet Exerc Sci* 18:7–13. doi:[10.3233/Ies-2010-0361](https://doi.org/10.3233/Ies-2010-0361)
- Bini RR, Tamborindéguy AC, Mota CB (2010b) Effects of saddle height, pedaling cadence, and workload on joint kinetics and kinematics during cycling. *J Sport Rehabil* 19:301–314
- Boone J, Barstow TJ, Celie B, Prieur F, Bourgois J (2014) The impact of pedal rate on muscle oxygenation, muscle activation and whole-body VO during ramp exercise in healthy subjects. *Eur J Appl Physiol*. doi:[10.1007/s00421-014-2991-x](https://doi.org/10.1007/s00421-014-2991-x)
- Brizendine JT, Ryan TE, Larson RD, McCully KK (2013) Skeletal muscle metabolism in endurance athletes with near-infrared spectroscopy. *Med Sci Sports Exerc* 45:869–875. doi:[10.1249/MSS.0b013e31827e0eb6](https://doi.org/10.1249/MSS.0b013e31827e0eb6)
- Broker JP, Gregor RJ (1994) Mechanical energy management in cycling-source relations and energy-expenditure. *Med Sci Sports Exerc* 26:64–74
- DeLorey DS, Kowalchuk JM, Paterson DH (2003) Relationship between pulmonary O<sub>2</sub> uptake kinetics and muscle deoxygenation during moderate-intensity exercise. *J Appl Physiol* 95:113–120. doi:[10.1152/jappphysiol.00956.2002](https://doi.org/10.1152/jappphysiol.00956.2002)
- Elmer SJ, Barratt PR, Korff T, Martin JC (2011) Joint-specific power production during submaximal and maximal cycling. *Med Sci Sports Exerc* 43:1940–1947. doi:[10.1249/MSS.0b013e31821b00c5](https://doi.org/10.1249/MSS.0b013e31821b00c5)
- Ericson M (1988) Mechanical muscular power output and work during ergometer cycling at different loads and speeds. *Eur J Appl Physiol* 57:382–387
- Ettema G, Loras HW (2009) Efficiency in cycling: a review. *Eur J Appl Physiol* 106:1–14. doi:[10.1007/s00421-009-1008-7](https://doi.org/10.1007/s00421-009-1008-7)
- Ettema G, Loras H, Leirdal S (2009) The effects of cycling cadence on the phases of joint power, crank power, force and force effectiveness. *J Electromyogr Kinesiol* 19:e94–e101. doi:[10.1016/j.jelekin.2007.11.009](https://doi.org/10.1016/j.jelekin.2007.11.009)
- Fenn WO (1924) The relation between the work performed and the energy liberated in muscular contraction. *J Physiol* 58:373–395
- Ferreira LF, Lutjemeier BJ, Townsend DK, Barstow TJ (2006) Effects of pedal frequency on estimated muscle microvascular O<sub>2</sub> extraction. *Eur J Appl Physiol* 96:558–563. doi:[10.1007/s00421-005-0107-3](https://doi.org/10.1007/s00421-005-0107-3)
- Foss O, Hallen J (2004) The most economical cadence increases with increasing workload. *Eur J Appl Physiol* 92:443–451. doi:[10.1007/s00421-004-1175-5](https://doi.org/10.1007/s00421-004-1175-5)
- Hug F, Dorel S (2009) Electromyographic analysis of pedaling: a review. *J Electromyogr Kinesiol* 19:182–198. doi:[10.1016/j.jelekin.2007.10.010](https://doi.org/10.1016/j.jelekin.2007.10.010)
- Hull ML, Jorge M (1985) A method for biomechanical analysis of bicycle pedalling. *J Biomech* 18:631–644
- Johnson MA, Polgar J, Weightman D, Appleton D (1973) Data on the distribution of fibre types in thirty-six human muscles. An autopsy study. *J Neurol Sci* 18:111–129
- Kounalakis SN, Geladas ND (2012) Cardiovascular drift and cerebral and muscle tissue oxygenation during prolonged cycling at different pedalling cadences. *Appl Physiol Nutr Metab* 37:407–417. doi:[10.1139/h2012-011](https://doi.org/10.1139/h2012-011)
- Kounalakis SN, Keramidis ME, Nassis GP, Geladas ND (2008) The role of muscle pump in the development of cardiovascular drift. *Eur J Appl Physiol* 103:99–107. doi:[10.1007/s00421-007-0662-x](https://doi.org/10.1007/s00421-007-0662-x)
- Leirdal S, Ettema G (2011) The relationship between cadence, pedalling technique and gross efficiency in cycling. *Eur J Appl Physiol* 111:2885–2893. doi:[10.1007/s00421-011-1914-3](https://doi.org/10.1007/s00421-011-1914-3)
- Lucia A, San Juan AF, Montilla M, CaNete S, Santalla A, Earnest C, Perez M (2004) In professional road cyclists, low pedaling cadences are less efficient. *Med Sci Sports Exerc* 36:1048–1054
- Martin JC, Brown NA (2009) Joint-specific power production and fatigue during maximal cycling. *J Biomech* 42:474–479. doi:[10.1016/j.jbiomech.2008.11.015](https://doi.org/10.1016/j.jbiomech.2008.11.015)
- McGhie D, Ettema G (2011) The effect of cadence on timing of muscle activation and mechanical output in cycling: on the activation dynamics hypothesis. *J Electromyogr Kinesiol* 21:18–24. doi:[10.1016/j.jelekin.2010.04.007](https://doi.org/10.1016/j.jelekin.2010.04.007)
- Mornieux G, Guenette JA, Sheel AW, Sanderson DJ (2007) Influence of cadence, power output and hypoxia on the joint moment distribution during cycling. *Eur J Appl Physiol* 102:11–18. doi:[10.1007/s00421-007-0555-z](https://doi.org/10.1007/s00421-007-0555-z)
- Murias JM, Spencer MD, Keir DA, Paterson DH (2013) Systemic and vastus lateralis muscle blood flow and O<sub>2</sub> extraction during ramp incremental cycle exercise. *Am J Physiol Regul Integr Comp Physiol* 304:R720–R725. doi:[10.1152/ajpregu.00016.2013](https://doi.org/10.1152/ajpregu.00016.2013)
- Neptune RR, Kautz SA, Hull ML (1997) The effect of pedaling rate on coordination in cycling. *J Biomech* 30:1051–1058
- Peltonen JE et al (2013) Alveolar gas exchange, oxygen delivery and tissue deoxygenation in men and women during incremental exercise. *Respir Physiol Neurobiol* 188:102–112. doi:[10.1016/j.resp.2013.05.014](https://doi.org/10.1016/j.resp.2013.05.014)
- Ryan TE, Erickson ML, Brizendine JT, Young HJ, McCully KK (2012) Noninvasive evaluation of skeletal muscle mitochondrial capacity with near-infrared spectroscopy: correcting for blood volume changes. *J Appl Physiol* 113:175–183. doi:[10.1152/jappphysiol.00319.2012](https://doi.org/10.1152/jappphysiol.00319.2012)
- Sargeant AJ (2007) Structural and functional determinants of human muscle power. *Exp Physiol* 92:323–331. doi:[10.1113/expphysiol.2006.034322](https://doi.org/10.1113/expphysiol.2006.034322)
- Sarre G, Lepers R, Maffiuletti N, Millet G, Martin A (2003) Influence of cycling cadence on neuromuscular activity of the knee extensors in humans. *Eur J Appl Physiol* 88:476–479. doi:[10.1007/s00421-002-0738-6](https://doi.org/10.1007/s00421-002-0738-6)
- Skovereng K, Ettema G, van Beekvelt M (2015) Local muscle oxygen consumption related to external and joint specific power. *Hum Mov Sci* 45:161–171. doi:[10.1016/j.humov.2015.11.009](https://doi.org/10.1016/j.humov.2015.11.009)
- Takaishi T, Ishida K, Katayama K, Yamazaki K, Yamamoto T, Moritani T (2002) Effect of cycling experience and pedal cadence on the near-infrared spectroscopy parameters. *Med Sci Sports Exerc* 34:2062–2071. doi:[10.1249/01.MSS.0000039304.91231.76](https://doi.org/10.1249/01.MSS.0000039304.91231.76)
- Umberger BR, Gerritsen KG, Martin PE (2006) Muscle fiber type effects on energetically optimal cadences in cycling. *J Biomech* 39:1472–1479. doi:[10.1016/j.jbiomech.2005.03.025](https://doi.org/10.1016/j.jbiomech.2005.03.025)
- van Beekvelt MC, Borghuis MS, van Engelen BG, Wevers RA, Colier WN (2001a) Adipose tissue thickness affects in vivo quantitative

- near-IR spectroscopy in human skeletal muscle. *Clin Sci (Lond)* 101:21–28
- Van Beekvelt MC, Colier WN, Wevers RA, Van Engelen BG (2001b) Performance of near-infrared spectroscopy in measuring local O<sub>2</sub> consumption and blood flow in skeletal muscle. *J Appl Physiol* 90:511–519
- van Soest AJ, Schwab AL, Bobbert MF, van Ingen Schenau GJ (1993) The influence of the biarticularity of the gastrocnemius muscle on vertical-jumping achievement. *J Biomech* 26:1–8
- Vogiatzis I, Habazettl H, Louvaris Z, Andrianopoulos V, Wagner H, Zakynthinos S, Wagner PD (2015) A method for assessing heterogeneity of blood flow and metabolism in exercising normal human muscle by near-infrared spectroscopy. *J Appl Physiol* 118:783–793. doi:[10.1152/jappphysiol.00458.2014](https://doi.org/10.1152/jappphysiol.00458.2014)
- Zajac FE (2002) Understanding muscle coordination of the human leg with dynamical simulations. *J Biomech* 35:1011–1018. doi:[10.1016/S0021-9290\(02\)00046-5](https://doi.org/10.1016/S0021-9290(02)00046-5)
- Zorgati H, Collomp K, Amiot V, Prieur F (2013) Effect of pedal cadence on the heterogeneity of muscle deoxygenation during moderate exercise. *Appl Physiol Nutr Metab* 38:1206–1210. doi:[10.1139/apnm-2012-0504](https://doi.org/10.1139/apnm-2012-0504)
